# Supplementary material for: Highly sensitive detection for cocaine using an aptamer–cocaine–aptamer method
Source: Royal Society of Chemistry journal article supplement (doi:10.1039/c9nj05147c), 2020-01-01
Supplement: c9nj05147c1.pdf [file c9nj05147c1.pdf]

## Highly Sensitive Detection for Cocaine Using Aptamer-Cocaine-

### Aptamer Method

Li Gao<sup>a\*</sup>, Huixing Wang<sup>a</sup>, Zebin Deng<sup>a</sup>, Wenwen Xiang<sup>a</sup>, Haifeng Shi<sup>a</sup>, Bing Xie<sup>b\*</sup>, Haixia Shi<sup>c\*</sup>

<sup>a</sup>Institute of Life Sciences, Jiangsu University, Zhenjiang 212013, P. R. China; <sup>b</sup>Department of Obstetrics and Gynecology, the Fourth People's Hospital of Zhenjiang, Zhenjiang, 212000, P. R. China; <sup>c</sup>P. E. Department of Jiangsu University, Zhenjiang 212013, P. R. China

\*To whom correspondence should be addressed. Email: gaoli@ujs.edu.cn

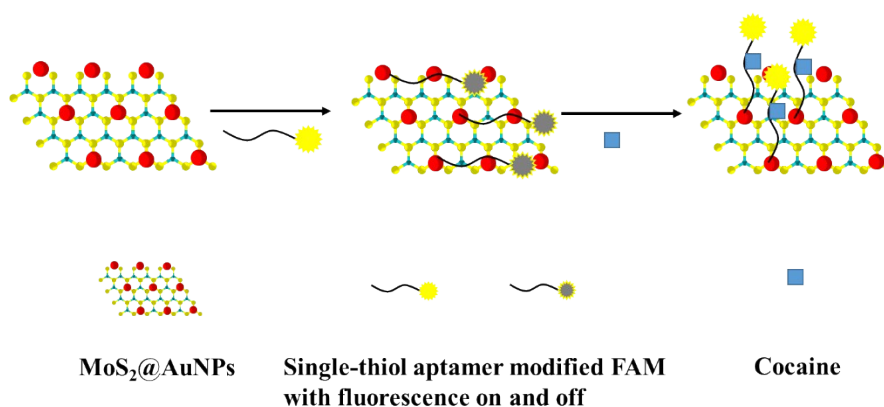

Fig.S1. The scheme of detecting cocaine using MoS<sub>2</sub>@AuNPs immobilized with single-thiol aptamer.

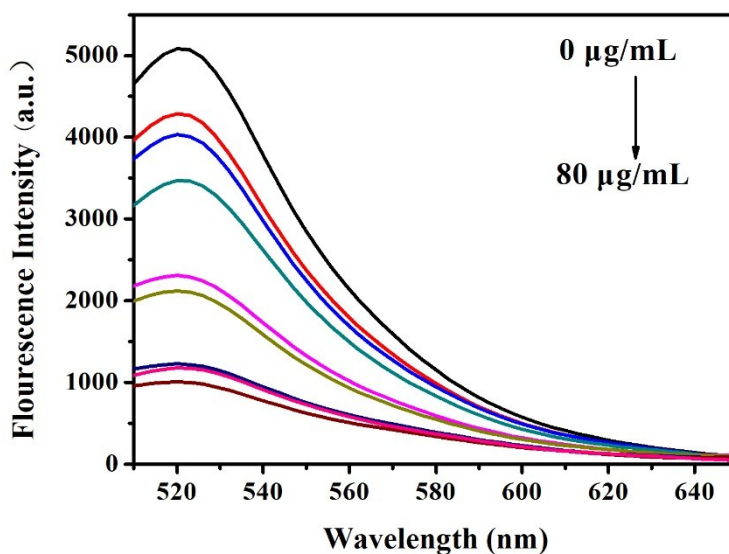

Fig.S2. The fluorescence intensity of FAM-aptamer with increasing concentration of

composite of MoS<sub>2</sub>@AuNP (0, 10, 20, 40, 50, 55, 60, 70, 80μg/mL).

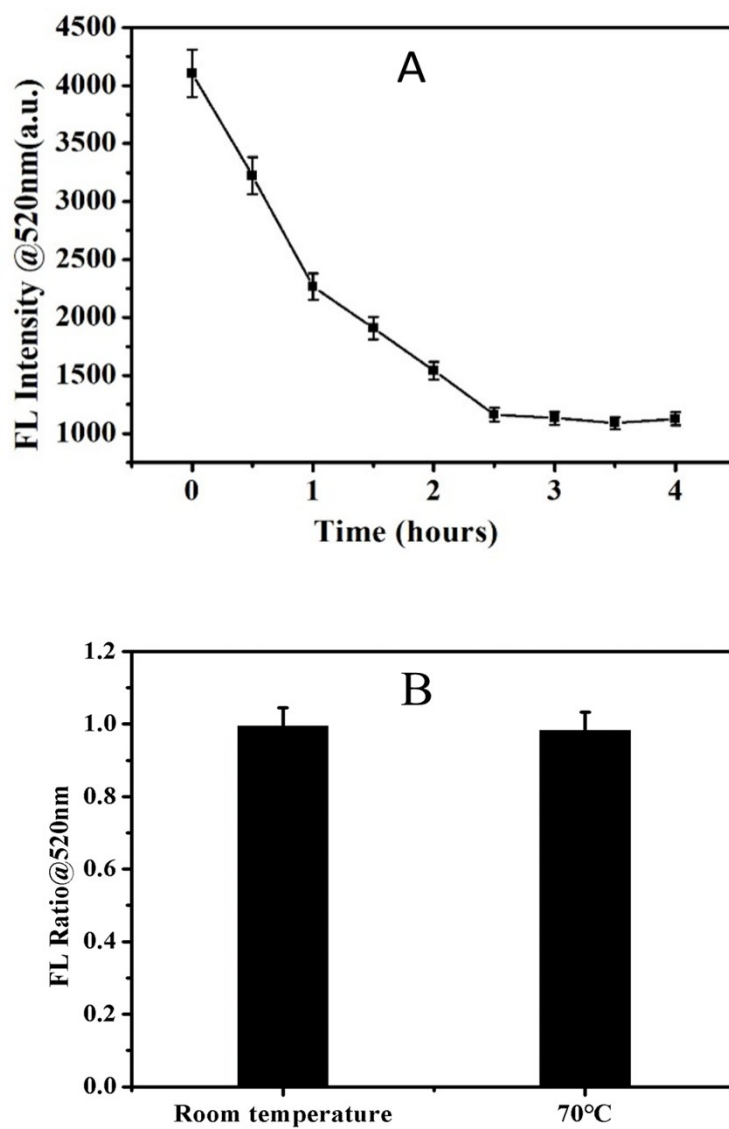

Fig.S3. (A).The quenching kinetic of the MoS<sub>2</sub>@AuNPs aptamer sensors. (B).The effect for the fluorescence intensity of aptamer with 70 °C.

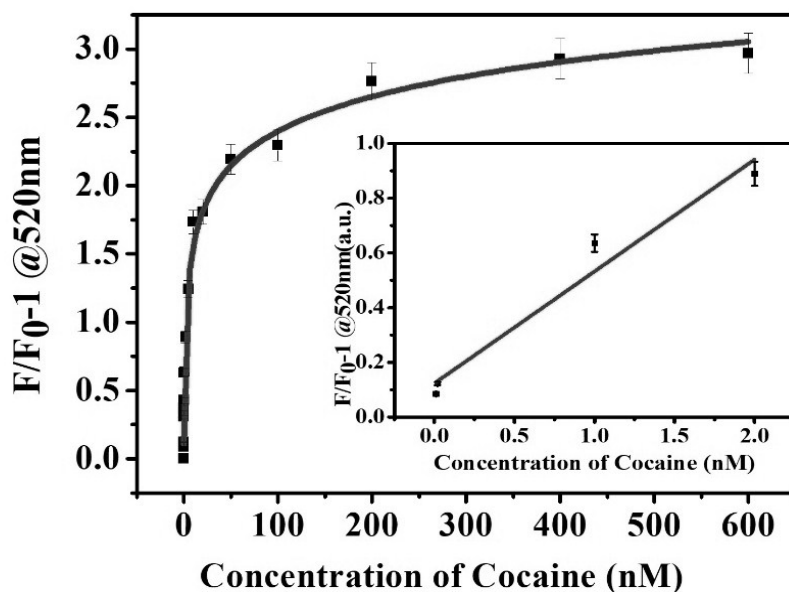

Fig.S4. The fluorescence intensity of MoS<sub>2</sub>-aptamer modified with FAM using different concentration of cocaine (0 to 600 nM, F<sub>0</sub> and F were the values of fluorescence intensities without and with cocaine. )

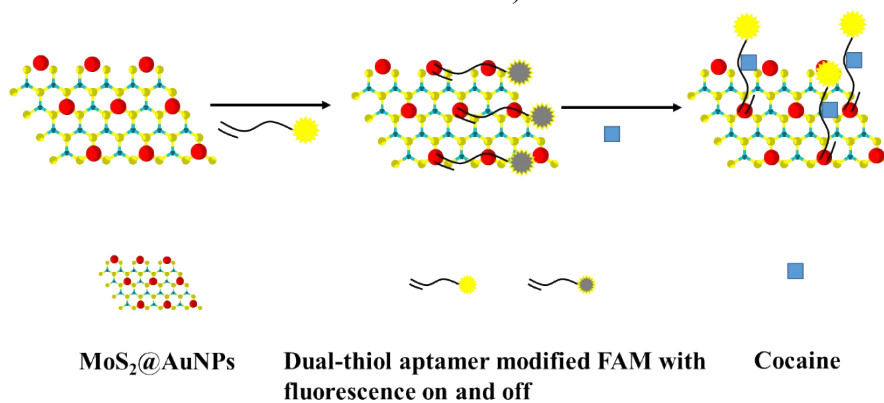

Fig.S5. The detection of cocaine using the MoS<sub>2</sub>@AuNPs with dual-thiol aptamer

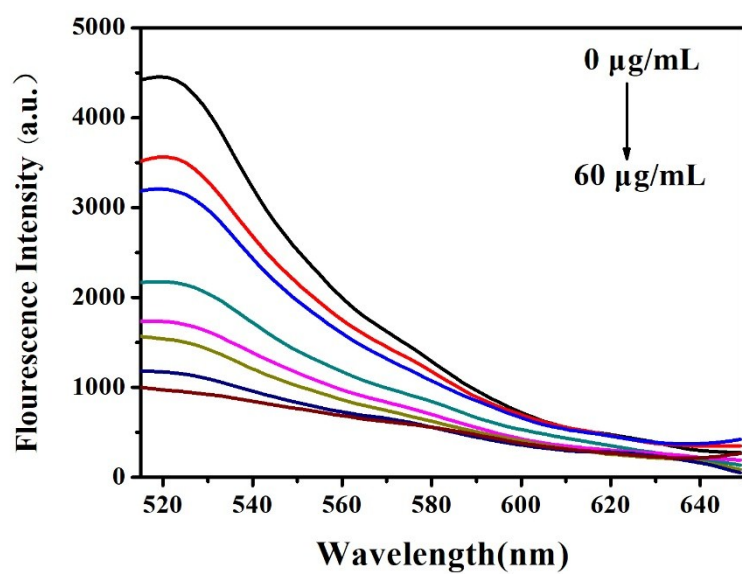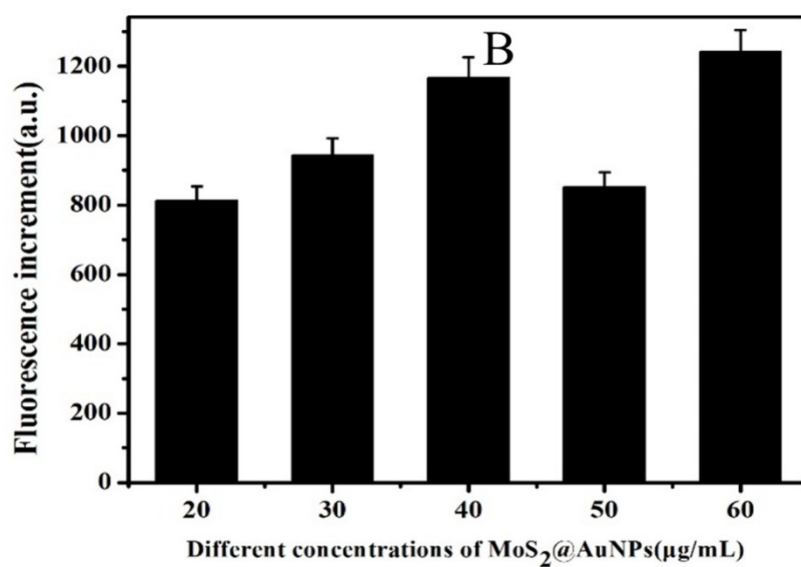

Fig.S6. (A). The fluorescence intensity of dual-thiol aptamer with increasing concentrations of composite of MoS<sub>2</sub>@AuNPs (0, 5, 10, 20, 30, 40, 50, 60 µg/mL). (B).The effects of several concentrations of MoS<sub>2</sub>@AuNPs for the fluorescence intensity in the presence of 5 nM cocaine.

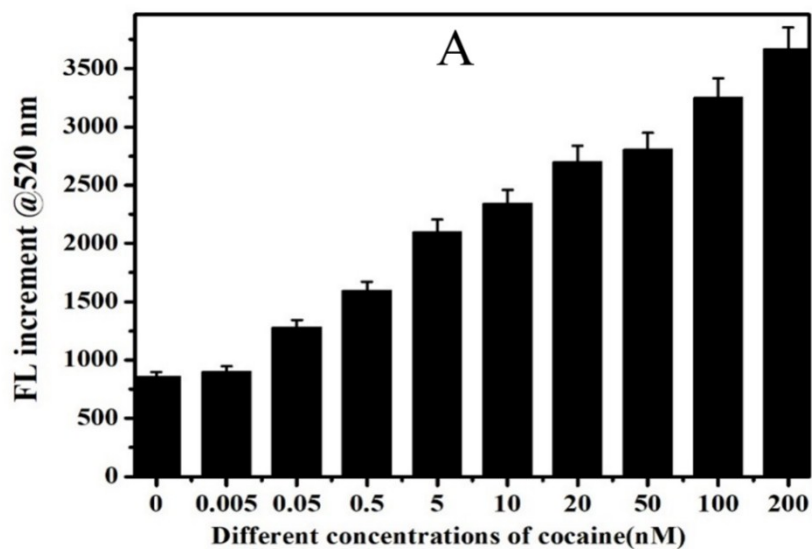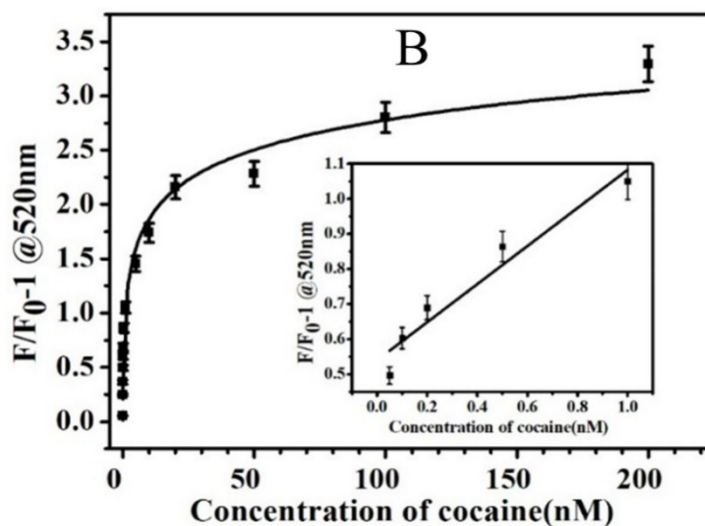

Fig.S7. (A). The fluorescence intensity with different concentrations of cocaine. (B).The fluorescence intensity with different concentrations of cocaine (0-200 nM, F and  $F_0$  were the fluorescence intensity before and after the addition of cocaine respectively)
